1 **Title: A qualitative study on factors influencing health**  
2 **workers' uptake of a pilot surgical antibiotic prophylaxis**  
3 **stewardship programme in selected Georgian hospitals**  
4

5 **Short Title: Factors influencing pilot SAP stewardship**  
6 **uptake in Georgia**  
7

8 Sideeka Narayan<sup>1</sup>, Sahil Khan Warsi<sup>1\*</sup>, Iago Kachkachishvili<sup>2</sup>, Osiko Kontselidze<sup>2</sup>, Mariam  
9 Jibuti<sup>2</sup>, Nino Esebua<sup>2</sup>, Ana Papiashvili<sup>2</sup>, Danilo Lo Fo Wong<sup>1</sup>, Ketevan Kandelaki<sup>1\*</sup>

10

11 <sup>1</sup> World Health Organization (WHO) Regional Office for Europe, Copenhagen, Denmark

12 <sup>2</sup> Institute of Social Studies and Analysis, Tbilisi, Georgia

13

14 \* Corresponding authors

15 E-mail: [kandelakik@who.int](mailto:kandelakik@who.int) (KK)

16 [warsis@who.int](mailto:warsis@who.int) (SKW)

17

18 SN: writing original draft, review and editing, formal analysis

19 SKW: conceptualization, methodology, writing original draft, review and editing, formal  
20 analysis, resources, supervision

21 IK: project administration, methodology, data curation, formal analysis, resources

22 OK: data curation, formal analysis, visualization

23 MJ: data curation, formal analysis, visualization

24 NE: data curation, formal analysis, visualization

25 AP: data curation, formal analysis, visualization

26 DLFW: project administration, supervision

27 KK: conceptualization, methodology, writing original draft, review and editing, formal analysis,  
28 resources, supervision

## 29 **Abstract**

30 Antimicrobial misuse in surgical antibiotic prophylaxis (SAP) can include the inappropriate use  
31 of broad-spectrum antibiotics or prolonged dosing. In 2021, a pilot antimicrobial stewardship  
32 programme (ASP) was launched in Georgia, which involved developing and adapting SAP  
33 guidelines, establishing an interprofessional SAP prescribing approach, collecting surgical site  
34 infection (SSI) data via routinely collected data and telephonic patient follow-ups, and providing  
35 surgical unit staff with prescribing feedback and training on antimicrobial resistance (AMR) and  
36 antimicrobial stewardship (AMS). ASP introduction was staggered across ten hospitals over  
37 three years.

38  
39 This study explored behavioural determinants of surgical teams' ASP uptake in five hospitals  
40 where the ASP was introduced or about to be introduced. Findings primarily concerned  
41 epidemiologists' and nurses' ASP-related behaviour. Those at ASP non-introduced hospitals  
42 were less involved in the SAP prescribing process, had lower AMR awareness, and lacked  
43 professional development opportunities. Those at ASP-introduced hospitals exhibited higher  
44 AMR knowledge and felt ASP participation boosted confidence, facilitated work, and furnished  
45 key professional development.

46  
47 Results indicate interprofessional collaboration on SAP prescribing supported ASP uptake across  
48 teams, and investment in health worker training and administrative encouragement ensured  
49 effective ASP participation and implementation. Findings highlight the crucial role of  
50 epidemiologists in SAP and illustrate a need for developing Georgian nurses' AMR

51 competencies as a vehicle to address public AMR knowledge gaps. Longer-term ASP uptake will  
52 need to consider the regulatory context in which hospitals lack access to national-level SSI data  
53 and feedback on SSI reporting but are fined for reporting non-compliance.

54  
55 Despite resource limitations and a small sample size, the study engaged all pilot ASP health  
56 workers. Respondents' inexperience of qualitative research participation and ensuing hesitation  
57 limited exploration of motivational factors supporting health workers' ASP uptake, which could  
58 be explored in further research.

59

## 60 **Introduction**

61 Antimicrobial resistance (AMR) is a global threat to public health. AMR occurs when  
62 microorganisms, such as bacteria, viruses, parasites and fungi, change so that they are no  
63 longer affected by antimicrobial medicines used to treat them. The development and spread of  
64 AMR is accelerated by the inappropriate use of antimicrobials, resulting in harder-to-treat  
65 infections.<sup>(1–3)</sup> The misuse of antimicrobials in health-care settings is one of the key modifiable  
66 drivers of the emergence of AMR. This issue deserves particular attention in surgical wards  
67 where antibiotic prophylaxis is routinely administered prior to surgery to help decrease the risk  
68 of postoperative infections. Addressing surgical antibiotic prophylaxis (SAP) requires an  
69 appreciation and understanding of the behavioural and cultural context influencing health-care  
70 professionals' practices and decisions.

71

72 Antimicrobial stewardship programmes (ASPs) are one of the most cost-effective interventions  
73 to optimize antimicrobial use, improve patient outcomes, and reduce the development and  
74 spread of AMR.(4,5) It involves a systematic approach to educate and support health-care  
75 professionals to follow evidence-based guidelines for prescribing and administering  
76 antimicrobials. Educating the health workforce is crucial, as they are key in safeguarding  
77 antimicrobial effectiveness. Successful ASPs not only equip practitioners with information, but  
78 do so by attending to the behavioural factors affecting programme uptake.(6,7)

79  
80 In Georgia, as in other countries, the inappropriate use of antibiotics, including for surgical  
81 prophylaxis, is characterized by a high use of broad-spectrum antibiotics and prolonged  
82 dosing.(8–10) Actions to contain the development and spread of AMR in Georgia have thus far  
83 mainly focused on strengthening AMR surveillance systems and implementing modern methods  
84 for infection prevention and control (IPC). However, limited actions have been implemented to  
85 establish ASPs and understand the factors affecting their uptake among health  
86 professionals.(11,12)

87  
88 In 2021, as part of Georgia’s 2017–2020 National action plan (NAP) to contain the spread of AMR,  
89 the International Centre for Antimicrobial Resistance Solutions (ICARS) began a three-year ASP  
90 to develop and introduce SAP guidelines in ten hospitals, aiming for 60% hospital guideline  
91 compliance within 12 months from ASP introduction. The ASP involved AMR and antimicrobial  
92 stewardship (AMS) training for surgical unit staff; data collection on surgical site infection (SSI)  
93 rates via post-surgical patient telephone interviews, and on antibiotic prescribing via monthly

94 point prevalence surveys (PPS); and feedback to surgical teams to adjust prescribing practice.  
95 Regarding health worker behaviours, the ASP primarily involved surgeons following new SAP  
96 guidelines, epidemiologists conducting PPS, and nurses conducting post-surgical patient  
97 interviews. The Ministry of Internally Displaced Persons from the Occupied Territories, Labor,  
98 Health and Social Affairs of Georgia (MoIDPLHSA) and ICARS signed a memorandum of  
99 understanding in September 2021, followed by an official project launch where ASP participating  
100 staff at all ten hospitals were informed on ASP objectives and timelines and their specific roles.  
101 ASP introduction was planned to begin in 2022 in overlapping stages for three hospitals in year  
102 1, four in year 2, and three in year 3.

103  
104 In collaboration with the MoIDPLHSA and National Centre for Disease Control (NCDC), the WHO  
105 Regional Office for Europe (Regional Office) and WHO Country Office in Georgia undertook a  
106 study in 2022 to identify barriers to and enablers for implementing the ICARS ASP during the first  
107 year of its introduction. The study was conducted in parallel to the ICARS ASP and followed the  
108 WHO Regional Office Tailoring Antimicrobial Resistance Programmes (TAP) method to identify  
109 barriers to and drivers of behaviours contributing to ASP uptake. National researchers from the  
110 Institute of Social Studies and Analysis (ISSA) conducted fieldwork across selected participating  
111 hospitals to understand factors affecting health workers' ASP-related behaviours.

112

## 113 **Methods**

### 114 **Study design and setting**

115 Data collection and analysis were conducted using the Capability, opportunity, and motivation  
116 for behaviour change (COM-B) theory, which is part of the Behaviour change wheel (BCW)  
117 framework to understand and evaluate health-related behaviour interventions.(13) The COM-B  
118 theory is built on a review of 19 existing behaviour change frameworks, and holds that public  
119 health behaviour change is influenced by the interlinked factors of individuals' capability,  
120 opportunity, and motivation to enact specific behaviours. Fig. 1 below illustrates how the COM-  
121 B factors are approached through TAP.(14)

122

#### 123 **Fig 1. The COM-B model adapted to AMR**

124

125 The COM-B theory was employed to understand the behaviour of each target group outlined  
126 below in relation to their function under or related to the ICARS ASP. Across the target groups,  
127 the behaviours explored included SAP prescribing and adherence to guidelines, conducting ASP-  
128 related surveillance and feedback, and integrating the ASP in hospital and surgical team practice.  
129 The behaviours explored for each target group are presented in Table 1 in the results section  
130 below.

131

132 Data was collected in 2022 from five of the ten hospitals. The research sites represented regional  
133 and hospital variation. Three hospitals were selected from Tbilisi and two from the regions,  
134 representing a large private, smaller private, teaching, maternity, and military hospital.

135

## 136 **Research participants**

137 The primary target groups were the ICARS ASP team at each hospital: one hospital administrator,  
138 one AMR champion, one epidemiologist, one surgical unit chief nurse and surgeons. In two  
139 hospitals, the hospital administrator or AMR champion was also a surgeon. In such cases, the  
140 individual participated in research in their administrator or AMR champion capacity and  
141 additional questions were also asked relating to their role as a surgeon. Research was also  
142 conducted with secondary target groups affecting the behaviour of primary target group  
143 participants. This included a clinical pharmacist, health professional association representatives,  
144 and pharmaceutical company representatives. Primary target group participants were sampled  
145 to include the entire ASP team at each hospital, and secondary target group participants were  
146 purposively sampled based on their availability and accessibility. Participants were recruited into  
147 the study from 1 May to 1 July 2022. All participants received information on research and were  
148 given the chance to ask questions before providing written and verbal consent to participate. The  
149 study was conducted in accordance with the Helsinki Declaration (1964, revised 2013), and  
150 received ethical approval from the WHO Research Ethics Committee, protocol number  
151 ERC.0003668, and the Institutional Review Board of the National Center for Disease Control and  
152 Public Health of Georgia, IRB number 2021-066.

153

## 154 **Data collection and analysis**

155 Given that only one participant in each target group was engaged in the ASP at each hospital,  
156 data was almost entirely collected via semi-structured, in-depth interviews (IDIs). Only one focus  
157 group discussion (FGD) was conducted with surgeons from the three Tbilisi hospitals. IDIs and  
158 the FGD were conducted using research guides, with questions developed via a COM-B-inspired  
159 activity organized by the WHO Regional Office with the participation of representatives from  
160 ICARS, NCDC, MoIDPLHSA, and the ASP hospitals. Questions addressed individuals' knowledge  
161 and perceptions of AMR and SAP, views on the ASP, and factors affecting ASP incorporation into  
162 hospital practice. The guides were initially developed in English and then translated to Georgian.

163  
164 Prior to data collection, the WHO Regional Office, ICARS and NCDC researchers conducted a  
165 week-long workshop with the national research team. During this workshop, national  
166 researchers were informed about the Georgian context of SAP and SSIs, the health system  
167 context of Georgia, and trained on COM-B theory and its use in research, data collection, and  
168 analysis. National researchers, jointly with WHO Regional Office, ICARS and NCDC  
169 representatives, reviewed each research guide, line-by-line, for linguistic and contextual  
170 appropriateness, and simultaneously adapted Georgian- and English-language versions to ensure  
171 coherence across all guides. The guides were then piloted before research to ensure feasibility.

172  
173 All discussions were audio-recorded and transcribed in Georgian before analysis. Transcripts  
174 were anonymized using participant IDs, ensuring no identifying details were included. As WHO  
175 Regional Office researchers could not be present during the initial stage of data collection, four



176 initial transcripts were translated in English and shared with them for feedback and for  
177 preliminary analysis training. A coding framework was developed based on sections of the  
178 research guides. National and WHO Regional Office researchers coded two initial transcripts  
179 separately and then compared results to identify differences. Based on these results, feedback  
180 was provided to national researchers and the coding framework was adapted to allow for  
181 emerging themes across transcripts. A second round of analysis was conducted with the  
182 remaining two English transcripts, with almost identical coding by all researchers. After this  
183 exercise, all transcripts were then coded and analysed directly from Georgian by national  
184 researchers.

185  
186 Coded data, observations, and quotations were organized into a Microsoft Excel spreadsheet for  
187 each target group in Georgian. National researchers developed a thematic report based on  
188 analysed data which was used by WHO Regional Office researchers to conduct a COM-B analysis  
189 of research findings by target group and hospital type.

190

## 191 **Results**

192 A total of 26 IDIs and one FGD were conducted with 31 participants from five hospitals. At the  
193 time of data collection, the ASP had been introduced in three of the five hospitals. Findings on  
194 factors affecting ASP uptake show similarities across target groups as well as differences  
195 between ASP-introduced and non-introduced hospitals. Primary COM-B factor findings are  
196 presented below, and an overview of participants by target group, ASP-related behaviours and  
197 research activities are presented in Table 1.

198

199 **Table 1. Participants by target group, ASP-related behaviour, and research activity**

| Target group                                   | ASP-related behaviour                                                   | Research activity | Total participants |
|------------------------------------------------|-------------------------------------------------------------------------|-------------------|--------------------|
| <i>Primary target group (ASP participants)</i> |                                                                         |                   |                    |
| Hospital administrator                         | Leads adoption and dissemination of SAP guidelines and ASP introduction | IDI               | 4                  |
| Hospital AMR champion                          | Coordinates ASP introduction, data collection/analysis and feedback     | IDI               | 3                  |
| Surgeons                                       | Receive training and use developed SAP guidelines                       | FGD               | 5                  |
|                                                |                                                                         | IDI               | 5                  |
| Epidemiologists                                | Collect and analyse SSI/PPS data for SAP ASP                            | IDI               | 5                  |
| Study nurse                                    | Collects SSI data from post-surgery patients                            | IDI               | 5                  |
| <i>Secondary target group (influencers)</i>    |                                                                         |                   |                    |
| Hospital pharmacists                           | Influence antibiotic availability and prescribing process               | IDI               | 1                  |
| Professional association representatives       | Influence behaviour of primary target group professionals               | IDI               | 2                  |
| Pharmaceutical company representatives         | Directly advertise and provide antibiotics to hospitals                 | IDI               | 1                  |
| <b>Total</b>                                   |                                                                         |                   | <b>31</b>          |

200

201 **Behaviour**

202 ASP-introduced hospital participants reported active involvement in ASP activities, while ASP  
 203 non-introduced hospitals' participants had limited involvement in similar activities. Variation  
 204 was primarily observed across hospitals in epidemiologist and nurse involvement in SAP.

205 Epidemiologists at all hospitals reported conducting surveillance on health-care associated  
 206 infections (HAIs), trainings on issues such as hand hygiene and disinfection-sterilization or HAI

207 reporting to NCDC. ASP-introduced hospital epidemiologists supervised medical staff on and  
208 monitored antibiotic prescription for guideline compliance. Conversely, ASP-non-introduced  
209 hospital epidemiologists were not involved in antibiotic selection or the prescribing process but  
210 believed they should be.

211 *"As for monitoring the use of antibiotics, I do not monitor what antibiotic the doctor*  
212 *prescribed and how. We talked about this issue with the quality service, that it is better if we*  
213 *get more actively involved in the issue. We have a plan to take one in ten cases and check if*  
214 *antibiotics have been prescribed according to the guideline."*

215 *– Epidemiologist, Hospital 1, ASP non-introduced*

216

217 Nurses in Georgia administer prescribed antibiotics and supervise therapy; they do not have the  
218 right to prescribe. ASP-introduced hospital nurses were more involved in patients' treatment,  
219 regularly communicating with them and providing information on AMR and the ASP. They  
220 interviewed patients one-week and one-month post-surgery, recording information on  
221 prescription and non-prescription antibiotic use, complaints and complications. ASP non-  
222 introduced hospital nurses were not involved in such activities.

223

224 Significant behavioural differences across hospitals were not observed for other target groups.

225 Surgeons develop patients' antibiotic treatment plans in consultation with other specialties,  
226 although one ASP non-introduced hospital administrator indicated some staff might rely on  
227 experience rather than evidence-based guidelines. Administrators, in general, ensure the  
228 quality and safety of patient care and implement treatment guidelines and monitor their

229 compliance. The AMR champion role was created for ASP; the majority of those in this role  
230 were already engaged in some form of administration or treatment strategizing.

231

## 232 **Capability**

233 Although all participants were informed via the 2021 ASP launch, most ASP non-introduced  
234 hospital participants were unaware of their hospital's participation and their roles. Differences  
235 in knowledge, skills and training were specifically observed among nurses and epidemiologists.  
236 Surgeons stated nurses lack required ASP competencies. A professional association  
237 representative reported AMR knowledge gaps among epidemiologists, citing insufficient up-to-  
238 date information and confirmed by ASP non-introduced hospital epidemiologists' unfamiliarity  
239 with the Access, watch, reserve (AWaRe) classification. ASP non-introduced nurses and  
240 epidemiologists expressed an interest to participate in trainings to strengthen knowledge of  
241 AMR and the ASP.

242

243 ASP-introduced hospital epidemiologists and nurses felt confident in their skills and reported  
244 significant improvement as a result of ASP trainings. Nurses expressed increased AMR and SAP  
245 knowledge, which facilitated patient communication, and believed the additional ASP duties  
246 and understanding of AMR were interesting and important for professional development.  
247 Administrators added that extra communication was often required for patients and their  
248 families to encourage appropriate antibiotic use. Epidemiologists demonstrated awareness of  
249 the AWaRe classification and proactive use of guidelines, reporting this as an important tool for  
250 effective monitoring and supportive to their work.

251 *“There were several cases when the doctor did not prescribe an antibiotic, but the patient*  
252 *replied that they still take it on their own. They even had complaints about it. They still think*  
253 *it is impossible for the treatment to go well without antibiotics.”*

254 *- Nurse, Hospital 5, ASP-introduced*

255  
256 A few capability findings related to participants’ perceptions. Regarding SAP guideline  
257 application, some ASP non-introduced hospital administrators and surgeons believed a  
258 consultative approach to patient antibiotic treatment planning was not necessary as national  
259 guidelines outlined available options. Epidemiologists perceived their facility’s SSI incidence was  
260 low at one to two cases per year.

261 *“We don't need to consult with colleagues [such as infectious disease specialists] on which*  
262 *antibiotic to use or replace. The Ministry has given us [SAP Guidelines] with the names of only*  
263 *two antibiotics.”*

264 *-Surgeon, Hospital 1, ASP non-introduced*

265

## 266 **Opportunity**

267 ASP-introduced hospital participants reported that the hospital-specific adaptation of national  
268 SAP guidelines and introduction of the digital patient recording system facilitated antibiotic  
269 treatment and planning. Several ASP-introduced hospital participants mentioned an initial  
270 increase in workload following ASP introduction but reported that this was integrated into  
271 routine practice.

272        *“...protocols developed will help health-care facilities use antibiotics more rationally. Besides,*  
273        *we, as doctors, will obtain knowledge and will disseminate it within the facility... Some*  
274        *surgeons are employed at several [other] hospitals and will disseminate the knowledge there*  
275        *as well. “*

276        *-AMR champion, Hospital 4, ASP-introduced*

277        While epidemiologists across all hospitals mentioned having continuous medical education  
278        opportunities on various topics, ASP non-introduced hospital epidemiologists and nurses  
279        reported not receiving AMR-specific training. AMR champions at ASP-introduced hospitals  
280        further reported ASP communication was presented to all services, and that SAP conferences  
281        and trainings were open to all staff, broadening staff involvement and exposure to the ASP. One  
282        epidemiologist said ASP scale-up and sustainability would depend on government enforcement  
283        through integration in national health plans.

284  
285        Opportunity barriers reported by epidemiologists related to reporting on SSIs. They do not have  
286        access to national-level information on SSIs. Additionally, while hospitals do not receive  
287        feedback from NCDC on SSI reporting, they are fined for non-compliance with reporting  
288        regulations.

289        *“In case of HAIs we report what went wrong and why HAI developed. We have no feedback*  
290        *but, in case of non-compliance with regulations, the clinic might be fined.”*

291        *- Epidemiologist, Hospital 5, ASP-introduced*

292

293 Participants cited the lack of public AMR awareness and demand for antibiotics as a social  
294 opportunity barrier. They added that patients could deviate from doctors' advice by buying  
295 over-the-counter (OTC) antibiotics. Relatedly, an AMR champion emphasized treatment plans  
296 must be effectively communicated to patients to increase treatment compliance and  
297 confidence. ASP-introduced hospital nurses further reported that patients positively responded  
298 to follow-up calls providing information on AMR, with only few becoming suspicious or anxious  
299 about their health.

300 *"[One challenge] is that the patient or their family member demands antibiotics... we*  
301 *convince them that it's not needed. We inform them about the possible side-effects of*  
302 *inappropriate use of antibiotics... The majority of patients are satisfied when you call them*  
303 *after the surgery to check on them ... in rare cases... even though they are informed in*  
304 *advance to expect two calls, they can become suspicious."*

305 *- Nurse, Hospital 1, ASP-introduced*

306

307 *"If the information is communicated correctly to the patients and the results are also*  
308 *favourable, the patient will go along with you. I think it is always possible to overcome*  
309 *stereotypes if you try. "*

310 *- AMR champion, Hospital 4, ASP-introduced*

311

## 312 **Motivation**

313 Participants across target groups reported initial hesitancy to the ASP, related to workload,  
314 effectiveness, patient acceptance, and other factors. However, they indicated that hospital

315 context influenced the willingness and ability to support and participate in the ASP. ASP-  
316 introduced hospital administrators reported the programme strengthened staff knowledge and  
317 responsibility. Nurses and epidemiologists specifically welcomed such qualification-raising  
318 opportunities and believed they are integral to ASP implementation. Epidemiologists also  
319 believed that administrators play a role in encouraging ASP acceptance and adherence.

320 *“The initial attitude was skeptical. However, it was seen that the [SAP] was successful...This*  
321 *requirement has been strengthened by the guidelines, and our administration actively*  
322 *supervises us.”*

323 *- Epidemiologist, Hospital 3, ASP-introduced*

324

325 *“...it would be better if we get involved, receive information and solve the problem*  
326 *together.”*

327 *-Head Nurse, Hospital 4, ASP-introduced*

328

329 *“We have had good results since the beginning. Our fears did not come true and even one*  
330 *dose proved to be sufficient for preventive purposes. These are the results we have had so*  
331 *far.”*

332 *- Surgeon, Hospital 1, ASP-introduced*

333

## 334 **Discussion**

335 The findings presented above highlight drivers supporting the ASP uptake in hospitals where it  
336 was introduced, and a few barriers potentially affecting longer-term ASP scale-up and



337 sustainability. Findings primarily relate to epidemiologists' and nurses' ASP behaviours, perhaps  
338 in part because other target groups' ASP roles did not differ significantly from their routine  
339 functions.

340

341 Firstly, participants across target groups appreciated the new dynamic in SAP prescribing  
342 introduced under the ASP, which encourages involvement of an interprofessional team.

343 Broader research on SAP ASPs emphasizes how successful ASP implementation requires  
344 overcoming paternalism in decision-making and fostering interprofessional consultation.(15–  
345 17) Unlike counterparts at other hospitals, epidemiologists and nurses from ASP-introduced  
346 hospitals were respectively involved in SAP treatment planning and in patient follow-up.

347 Research participants from both these groups valued the increased educational opportunities  
348 and concomitant professional development offered under the ASP, despite an indication of  
349 having increased workloads, and felt it successfully supported them in carrying out their roles.

350 Their view echoes research on SAP ASPs that stresses the need to invest in health worker  
351 education to ensure their effective participation and consequently successful ASP  
352 implementation.(18–20)

353

354 Research also showed epidemiologists and nurses across all hospitals play an important role in  
355 SAP. ASP-participating hospital participants not only expressed this belief, but also explained  
356 ASP participation boosted their professional confidence. Nurses in particular mentioned this  
357 fact with regard to discussing AMR with patients. Global research illustrates epidemiologists are  
358 critical to ASP efforts in leadership support, sharing surveillance data or outbreak alerts,

359 bridging gaps between departments, and treatment algorithm development.(19,21) Nurses, in  
360 turn, have been shown to be crucial across the health economy, especially in fostering health  
361 literacy of AMR through effective communication and education.(18,21) Investment in  
362 developing nurses' AMR competencies could be particularly important in the Georgian context.  
363 As surgeon and administrator participants noted, while nurses played an important role in ASP,  
364 many did not have sufficient qualifications. This is corroborated by reporting that patient and  
365 health outcomes in Georgia are affected by a nursing shortage, affected by factors such as low  
366 wages, professional development opportunities, labour migration, and social stigma.(22–24)  
367  
368 Barriers to health worker ASP uptake related to the ASP delivery and health system context.  
369 Non-introduced hospital participants lacked awareness of the SAP project. This could be due to  
370 several factors, including staff turnover and limited communication on the ASP with the  
371 hospitals between the programme launch and introduction. The unavailability of national-level  
372 information on SSIs, combined with fines for not reporting and a lack of feedback to hospitals  
373 on SSI reporting, could impede longer-term reporting behaviour and limit access to up-to-date  
374 information to support appropriate SAP. While behaviour change interventions are effective to  
375 address AMR, wider health system level changes, such as effective SSI reporting and feedback,  
376 are necessary to support ASP scale-up and sustainability.(25,26)  
377  
378 Another factor cited as affecting long-term ASP sustainability was patients' demand for and  
379 access to antibiotics OTC, leading to their disregard of doctors' treatment advice. While public  
380 awareness of AMR is a widespread issue, nurses did report their ASP training equipped them

381 with knowledge and skills to effectively communicate with patients on AMR and appropriate  
382 antibiotic use, which administrators indicated was a particular challenge. In this way, the ASP  
383 could address an important communication skills gap. Investing in training health workers is  
384 important. Public attitudes towards AMR in Georgia and elsewhere have been shown to be  
385 effectively addressed through education via schools or by health workers, whom the public see  
386 as trusted sources of health information, rather than solely via information campaigns.(8,27–  
387 29)

388  
389 Two challenges limiting study results related to the time available for research and to  
390 navigating health worker concerns around participation. Resource constraints decreased the  
391 available time for research and analysis. To address this, time was allocated for researcher  
392 training on SAP and ASP, theoretical approaches for data collection and interpretation,  
393 conducting research and analysis, and collaborating with diverse research participants. Health  
394 workers, especially nurses, were new to participating in qualitative research, and despite  
395 providing informed consent, were concerned of being professionally assessed. This fact limited  
396 participants' responses and, subsequently, information on motivation factors affecting  
397 participants' behaviours. Nonetheless, almost all ASP participants were included in research,  
398 and findings provide relevant insights following other qualitative studies revealing SAP ASPs as  
399 affected by multiple factors. These include missed opportunities due to professional  
400 hierarchies, low health worker competencies or confidence, and unawareness of local AMR  
401 epidemiology.(15,30,31)

402

## 403 **Conclusion**

404 Study findings indicate the introduction of interprofessional collaboration on SAP supported  
405 ASP uptake among all participants. Epidemiologists' and nurses' uptake was encouraged by the  
406 additional professional development opportunities provided under ASP and facilitated by  
407 increased SAP and AMR knowledge. Further inquiry should explore motivation factors  
408 supporting health workers' ASP uptake, which would require addressing health worker  
409 concerns on research participation.

410

## 411 **Acknowledgements**

412 The authors would like to thank Marika Tsereteli (ICARS) for support and coordination on in-  
413 country research; David Chakhunashvili (NCDC) for support in researcher training; Marine  
414 Baidauri and colleagues at the MoIDPLHSA for clarifying questions arising from research; and  
415 Giorgi Kurtsikashvili (WHO Country Office in Georgia) and the leadership of the NCDC and  
416 MoIDPLHSA for coordination and support to the project. Additionally, we would like to thank  
417 Paul Csagoly for his contributions to the editing of the manuscript.

418 Disclaimer: The authors affiliated with the World Health Organization (WHO) are alone  
419 responsible for the views expressed in this publication and they do not necessarily represent  
420 the decisions or policies of the WHO.

421

## 422 References

- 423 1. WHO. Antibiotic Resistance: Key Facts [Internet]. 2018 [cited 2019 Mar 12]. Available from:  
424 <https://www.who.int/news-room/fact-sheets/detail/antibiotic-resistance>
- 425 2. WHO Regional Office for Europe. Control antibiotic misuse or the drugs won't work, warn WHO  
426 experts. WHO News [Internet]. 2023 Nov 23; Available from:  
427 [https://www.who.int/europe/news/item/23-11-2023-control-antibiotic-misuse-or-the-drugs-won-t-  
428 work--warn-who-  
429 experts#:~:text=While%20AMR%20is%20a%20natural%20phenomenon%2C%20the%20developmen  
430 t,to%2010%20million%20deaths%20a%20year%20by%202050.](https://www.who.int/europe/news/item/23-11-2023-control-antibiotic-misuse-or-the-drugs-won-t-work--warn-who-experts#:~:text=While%20AMR%20is%20a%20natural%20phenomenon%2C%20the%20development,to%2010%20million%20deaths%20a%20year%20by%202050.)
- 431 3. Velazquez-Meza ME, Galarde-López M, Carrillo-Quiróz B, Alpuche-Aranda CM. Antimicrobial  
432 resistance: One Health approach. *Vet World* [Internet]. 2022 Mar 28 [cited 2024 Feb 19];743–9.  
433 Available from: <http://www.veterinaryworld.org/Vol.15/March-2022/27.html>
- 434 4. WHO Regional Office for Europe. Antimicrobial stewardship interventions: a practical guide  
435 [Internet]. Copenhagen: WHO Regional Office for Europe; 2021. Available from:  
436 <https://iris.who.int/bitstream/handle/10665/340709/9789289054980-eng.pdf>
- 437 5. World Health Organization. Antimicrobial stewardship programmes in health-care facilities in low-  
438 and middle-income countries. A practical toolkit [Internet]. Geneva: World Health Organization;  
439 2019. Available from: [https://iris.who.int/bitstream/handle/10665/329404/9789241515481-  
440 eng.pdf?sequence=1](https://iris.who.int/bitstream/handle/10665/329404/9789241515481-eng.pdf?sequence=1)
- 441 6. Arnold S, Straus S. Interventions to improve antibiotic prescribing practices in ambulatory care.  
442 *Cochrane Database Syst Rev* [Internet]. 2005;(4). Available from:  
443 <https://doi.org/10.1002/14651858.CD003539.pub2>
- 444 7. McCullough AR, Glasziou PP. Delayed Antibiotic Prescribing Strategies—Time to Implement? *JAMA*  
445 *Intern Med* [Internet]. 2016 Jan 1 [cited 2021 Apr 27];176(1):29–30. Available from:  
446 <https://doi.org/10.1001/jamainternmed.2015.7095>
- 447 8. Singh-Phulgenda S, Antoniou P, Wong DLF, Iwamoto K, Kandelaki K. Knowledge, attitudes and  
448 behaviors on antimicrobial resistance among general public across 14 member states in the WHO  
449 European region: results from a cross-sectional survey. *Front Public Health* [Internet]. 2023 Nov 23  
450 [cited 2024 Mar 19];11:1274818. Available from:  
451 <https://www.frontiersin.org/articles/10.3389/fpubh.2023.1274818/full>
- 452 9. Malaria L, Wagenaar I, Karatuna O, Tambic Andrasevic A, Tsereteli D, Baidauri M, et al. Setting up  
453 laboratory-based antimicrobial resistance surveillance in low- and middle-income countries: lessons  
454 learned from Georgia. *Clin Microbiol Infect* [Internet]. 2021 Oct [cited 2024 Mar 19];27(10):1409–  
455 13. Available from: <https://linkinghub.elsevier.com/retrieve/pii/S1198743X21002676>
- 456 10. WHO Regional Office for Europe. Antimicrobials supplied in community pharmacies in eastern  
457 Europe and central Asia in the early phases of the COVID-19 pandemic [Internet]. 2022. Available  
458 from: <https://iris.who.int/handle/10665/355796>

- 459 11. European Centre for Disease Prevention and Control, World Health Organization. Antimicrobial  
460 resistance surveillance in Europe 2023-2021 data. Stockholm; 2023.
- 461 12. World Health Organization Regional Office for Europe. Proof-of-principle routine diagnostic project  
462 for antimicrobial resistance surveillance: evaluation report. Georgia. [Internet]. 2017. Available  
463 from: <https://iris.who.int/handle/10665/350721>
- 464 13. Michie S, Atkins L, West R. The behaviour change wheel: a guide to designing interventions. First  
465 edition. London: Silverback Publishing; 2014. 329 p.
- 466 14. World Health Organization Regional Office for Europe. The TAP quick guide: a practical handbook  
467 for implementing tailoring antimicrobial resistance programmes [Internet]. World Health  
468 Organization. Regional Office for Europe. Licence: CC BY-NC-SA 3.0 IGO; 2021. Available from:  
469 <https://iris.who.int/handle/10665/341631>
- 470 15. Parker H, Frost J, Day J, Bethune R, Kajamaa A, Hand K, et al. Tipping the balance: A systematic  
471 review and meta-ethnography to unfold the complexity of surgical antimicrobial prescribing  
472 behavior in hospital settings. Blumberg S, editor. PLOS ONE [Internet]. 2022 Jul 20 [cited 2024 Mar  
473 21];17(7):e0271454. Available from: <https://dx.plos.org/10.1371/journal.pone.0271454>
- 474 16. Broom J, Broom A. Fear and hierarchy: critical influences on antibiotic decision-making in the  
475 operating theatre. J Hosp Infect [Internet]. 2018 Jun [cited 2024 Mar 22];99(2):124–6. Available  
476 from: <https://linkinghub.elsevier.com/retrieve/pii/S0195670117306783>
- 477 17. Ierano C, Thursky K, Peel T, Rajkhowa A, Marshall C, Ayton D. Influences on surgical antimicrobial  
478 prophylaxis decision making by surgical craft groups, anaesthetists, pharmacists and nurses in public  
479 and private hospitals. Gurgel RQ, editor. PLOS ONE [Internet]. 2019 Nov 14 [cited 2024 Mar  
480 22];14(11):e0225011. Available from: <https://dx.plos.org/10.1371/journal.pone.0225011>
- 481 18. Castro-Sánchez E, Bosanquet J, Courtenay M, Gallagher R, Gotterson F, Manias E, et al. Nurses: an  
482 underused, vital asset against drug-resistant infections. The Lancet [Internet]. 2022 Sep [cited 2024  
483 Mar 22];400(10354):729. Available from:  
484 <https://linkinghub.elsevier.com/retrieve/pii/S0140673622015318>
- 485 19. Abbas S, Stevens MP. The Role of the Hospital Epidemiologist in Antibiotic Stewardship. Med Clin  
486 North Am [Internet]. 2018 Sep [cited 2024 Mar 22];102(5):873–82. Available from:  
487 <https://linkinghub.elsevier.com/retrieve/pii/S0025712518300403>
- 488 20. Gyssens IC. Role of Education in Antimicrobial Stewardship. Med Clin North Am [Internet]. 2018 Sep  
489 [cited 2024 Mar 22];102(5):855–71. Available from:  
490 <https://linkinghub.elsevier.com/retrieve/pii/S0025712518300609>
- 491 21. Sartelli M, Labricciosa FM, Barbadoro P, Pagani L, Ansaloni L, Brink AJ, et al. The Global Alliance for  
492 Infections in Surgery: defining a model for antimicrobial stewardship—results from an international  
493 cross-sectional survey. World J Emerg Surg [Internet]. 2017 Dec [cited 2024 Mar 22];12(1):34.  
494 Available from: <http://wjeb.biomedcentral.com/articles/10.1186/s13017-017-0145-2>
- 495 22. WHO. "Every young nurse wants to leave this country" – Natalia Chikovani talks about challenges of  
496 nursing in Georgia. Newsrom [Internet]. 2021 Dec 13 [cited 2024 Mar 22]; Available from:

- 497 <https://www.who.int/europe/news-room/feature-stories/item/every-young-nurse-wants-to-leave-498 this-country-natalia-chikovani-talks-about-challenges-of-nursing-in-georgia>
- 499 23. Kurashvili M, Reinhold K, Jarvis M. Work Ability and Psychosocial Factors in Healthcare Settings  
500 During COVID-19 Pandemic – Specific Focus on Ageing Workers. *Econ Bus* [Internet]. 2022 Jan 1  
501 [cited 2024 Mar 22];36(1):164–78. Available from: [https://www.sciendo.com/article/10.2478/eb-  
502 2022-0011](https://www.sciendo.com/article/10.2478/eb-502 2022-0011)
- 503 24. Chanturidze T, Ugulava T, Durán A, Ensor T, Richardson E. Georgia: Health system review. *Health  
504 Syst Transit*. 2009;11(8).
- 505 25. Hijazi K, Joshi C, Gould IM. Challenges and opportunities for antimicrobial stewardship in resource-  
506 rich and resource-limited countries. *Expert Rev Anti Infect Ther* [Internet]. 2019 Aug 3 [cited 2024  
507 Mar 22];17(8):621–34. Available from:  
508 <https://www.tandfonline.com/doi/full/10.1080/14787210.2019.1640602>
- 509 26. Ierano C, Thursky K. The need for a national framework to optimise surgical antimicrobial use in  
510 Australia. *Infect Dis Health* [Internet]. 2021 Nov [cited 2024 Mar 22];26:S6. Available from:  
511 <https://linkinghub.elsevier.com/retrieve/pii/S246804512100064X>
- 512 27. Alejandro AL, Leo WWC, Bruce M, Gimutao K. Does antibiotic awareness campaigns exposure  
513 decrease intention to demand antibiotic treatment? Testing a structural model among parents in  
514 Western Australia. Basu S, editor. *PLOS ONE* [Internet]. 2023 May 18 [cited 2024 Mar  
515 22];18(5):e0285396. Available from: <https://dx.plos.org/10.1371/journal.pone.0285396>
- 516 28. Wang S, Ogunseitan O. A Case for Early Education Toward Sustainable Antibiotic Stewardship. In  
517 Belgrade, Serbia; 2021. Available from: [https://www.publichealth-  
518 conference.org/uploads/1/1/4/7/11479227/phc2021\\_conference\\_proceedings.pdf#page=6](https://www.publichealth-518 conference.org/uploads/1/1/4/7/11479227/phc2021_conference_proceedings.pdf#page=6)
- 519 29. Parveen S, Garzon-Orjuela N, Amin D, McHugh P, Vellinga A. Public Health Interventions to Improve  
520 Antimicrobial Resistance Awareness and Behavioural Change Associated with Antimicrobial Use: A  
521 Systematic Review Exploring the Use of Social Media. *Antibiotics* [Internet]. 2022 May 16 [cited  
522 2024 Mar 22];11(5):669. Available from: <https://www.mdpi.com/2079-6382/11/5/669>
- 523 30. Çakmakçı M. Antibiotic stewardship programmes and the surgeon’s role. *J Hosp Infect* [Internet].  
524 2015 Apr [cited 2024 Mar 21];89(4):264–6. Available from:  
525 <https://linkinghub.elsevier.com/retrieve/pii/S0195670115000535>
- 526 31. Davey P, Marwick CA, Scott CL, Charani E, McNeil K, Brown E, et al. Interventions to improve  
527 antibiotic prescribing practices for hospital inpatients. *Cochrane Effective Practice and Organisation  
528 of Care Group*, editor. *Cochrane Database Syst Rev* [Internet]. 2017 Feb 9 [cited 2024 Mar  
529 21];2017(2). Available from: <http://doi.wiley.com/10.1002/14651858.CD003543.pub4>
- 530



## Capability

- **Knowledge:** Practitioner and consumer knowledge of ABR and AMR
- **Efficacy:** Individual belief of practitioner or consumer that they have the capability to influence AMR and ABR
- **Skills:** Practitioner skills, and trust in their own skills, including interpersonal communications with consumer on prescribing practices
- **Resilience:** Practitioner stamina and willpower to follow-through on intentions to address AMR
- **Understanding:** Individual understanding of how to reduce the spread of AMR in a hospital, clinic or other setting, or understanding of the individual role in reducing AMR and its implications

## Opportunity

- **Access:** Practitioner access to infection control supplies, such as soap and hand gel; consumer access to information, such as knowledge materials; consumer access to safe and quality medicines and vaccines; convenience of antibiotic consumption practices for consumers
- **Regulations:** Implementation of infection control interventions; implementation of antimicrobial stewardship practices
- **Culture:** Open culture to report health care-associated infections; a 'hygiene' culture; social practices around the use of traditional vs 'western' medicines
- **Social norms and values:** Peer pressure for practitioners to influence or adapt infection control practices

## PRACTITIONERS ANTIBIOTIC PRESCRIBING PRACTICES AND BEHAVIOUR

## Motivation

- **Beliefs:** Practitioner belief in prudent prescribing practices; consumer belief in practitioner recommendations on the safe use of antibiotics
- **Values:** Practitioner individual values for prescribing habits; individual values for patient safety and service delivery quality
- **Intentions:** Practitioner motivation to improve prescribing practices and learn more about AMR; interpersonal communications between the practitioner and consumer impacting how the practitioner's recommendations are received
- **Inhibitions:** Factors that may affect the practitioner in decision-making for antibiotic prescription practices
